# Supplementary material
Source: Springer Nature journal article supplement (http://www.springermedizin.de/resource/supplementary/13034_2010_132_MOESM1_ESM.pdf/9652442)
Supplement: MOESM1 [file 9652442]

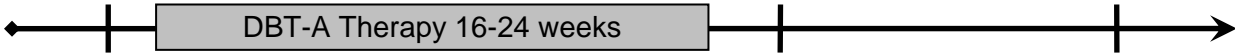

**t<sub>1</sub>**  
Beginning of  
therapy

**t<sub>2</sub>**  
Four weeks after  
the end of therapy

**t<sub>3</sub>**  
One year after  
the end of therapy
